1 **Effects of water content and mesh size on tea bag decomposition**

2

3 Taiki Mori <sup>a,\*</sup>, Ryota Aoyagi <sup>b</sup>, Hiroki Taga <sup>c</sup>, and Yoshimi Sakai <sup>a</sup>

4

5 <sup>a</sup> Kyushu Research Center, Forestry and Forest Products Research Institute, FFPRI,  
6 Kurokami 4-11-16, Kumamoto 860-0862, Japan

7 <sup>b</sup> Department of Forest Vegetation, Forestry and Forest Products Research Institute,  
8 FFPRI, Matsunosato 1, Tsukuba, Ibaraki 305-8687, Japan

9 <sup>c</sup> Forest Ecology Lab., Graduate School of Agriculture, Kyoto University,  
10 Kitashirakawa Oiwake-cho Sakyo-ku, Kyoto 606-8502, Japan

11

12 \* Corresponding author

13 E-mail address: [taikimori7@gmail.com](mailto:taikimori7@gmail.com)

14

15 **Abstract**

16 The tea bag method was developed to provide uniform litter bags that enable  
17 comparison of organic matter decomposition rates on a large scale. However, it remains  
18 uncertain whether tea bag decomposition in response to wetness is representative of that  
19 of natural litters. We performed incubation experiments to examine whether the effect  
20 of soil water on tea bag decomposition becomes inhibitory at higher water contents, as  
21 was demonstrated in natural leaf litters. In addition, we performed field studies in a  
22 mixed forest and cedar plantation in Japan to compare two litter bag mesh sizes:  
23 0.25-mm mesh, the size previously used by a major manufacturer of tea bags (Lipton),  
24 and nonwoven bags with mesh sizes finer than 0.25 mm, which are currently produced  
25 by Lipton. Both green tea and rooibos tea exhibited higher decomposition rates at  
26 higher water contents, but decomposition was inhibited at the highest water content,  
27 consistent with conceptual models of natural litters. The nonwoven tea bags did not  
28 show lower decomposition rates, despite the finer mesh size. Rather, the nonwoven  
29 rooibos tea bags exhibited slightly higher decomposition rates than the 0.25-mm mesh  
30 bags in the cedar plantation, possibly due to a greater abundance of microorganisms that  
31 decompose litters in the nonwoven bags, due to the decrease in predation by mesofauna.  
32 Our findings provide essential information for future studies of tea bag decomposition.

33

34 *Keywords: Early stage decomposition; leaching loss*

35

36

37 **Introduction**

38 Recent anthropogenic activities have caused global issues such as climate change and  
39 nitrogen loading, which may have a considerable negative impact on biodiversity and  
40 ecosystem services. To understand the long-term impact of these global issues on  
41 ecosystems, it is essential to examine how environmental perturbation at a large scale  
42 affects litter decomposition rates, because decomposition is a basic ecosystem process  
43 required to sustain nutrient cycling. However, the commonly used litter bag method has  
44 difficulty in detecting the effects of environmental factors on decomposition at a large  
45 geographical scale because it is difficult to standardize litter quality, which is a primary  
46 factor controlling litter decomposition rates (Cornwell et al. 2008, Zhang et al. 2008).

47 The tea bag method, introduced by Keuskamp et al. (2013), provides  
48 standardized litter decomposition data due to uniformity of the litters and bags, which is  
49 necessary for large-scale analysis of the effects of environmental factors on  
50 decomposition rates. The tea bag method uses commercially available tetra-shaped tea  
51 bags of green tea (*Camellia sinensis*) and rooibos tea (*Aspalathus linearis*), produced by  
52 Lipton, as a substitute for litters and soil organic matter. The amount of tea leaves  
53 decomposed during a 90-day incubation period is used to calculate the decomposition  
54 constant  $k$  and stabilization factor  $S$  (Tea Bag Index) (Keuskamp et al. 2013). Temporal  
55 variations in chemical composition during the decomposition process exhibited were  
56 typical of natural leaf litters (Duddigan et al. 2020), indicating that tea bags can be  
57 representative of natural litters. A large number of studies have used the tea bag method  
58 to assess decomposition potential (Fujii et al. 2017, Djukic et al. 2018, Mueller et al.  
59 2018, Petraglia et al. 2019, Suzuki et al. 2019).

60 However, it remains uncertain whether tea bag decomposition in response to  
61 wetness is representative of that of natural litters. Generally, higher decomposition rates  
62 are observed in wetter conditions, but excess water inhibits decomposition: according to  
63 Prescott (2010), water contents higher than 80% (wet weight basis) suppresses litter  
64 decomposition rates. By contrast, a field experiment reported that tea bag  
65 decomposition was not suppressed, even at high water contents, based on comparison of  
66 tea bag decomposition data obtained from various study sites (Petraglia et al. 2019). Tea  
67 leaves may have large water-leachable fractions, where the inhibitory impact of very  
68 high water content on litter decomposition may be negated by large leaching fractions  
69 under wetter conditions. If this is the case, tea bags should not be used to determine  
70 litter decomposition rates under high soil water contents. In field studies, however, other  
71 environmental factors covary with soil water content, so it remains unclear whether the  
72 effect of soil water on tea bag decomposition becomes inhibitory at higher water

73 contents. In the present study, we performed laboratory incubation and leaching  
74 experiments to clarify the effect of water content on tea bag decomposition, and the  
75 potential contribution of leaching loss.

76 To utilize the tea bag method to test the impact of environmental changes on  
77 litter decomposition at a large scale, a practical issue must be resolved first. Lipton  
78 changed the mesh materials for its tea bags from woven nylon mesh (0.25 mm) to  
79 polypropylene nonwoven mesh (non-uniform size, but finer than 0.25 mm; see Fig. S1)  
80 in 2017. Since the previously used woven bags are unavailable, future works should use  
81 the new nonwoven bags. However, we are uncertain whether the newly obtained data  
82 can be combined with previous data obtained using the 0.25-mm mesh bags. Because  
83 mesh size generally affects the accessibility of decomposers and microclimate in litter  
84 bags (Bradford et al. 2002, Powers et al. 2009), any change in mesh size of tea bags is  
85 likely to affect the decomposition rate. To date, no data have shown the impact of mesh  
86 size (0.25-mm mesh vs. nonwoven mesh) on tea bag decomposition. In the present  
87 study, we compared two types of tea bags with different mesh sizes, namely, 0.25-mm  
88 mesh bags and nonwoven bags with mesh sizes finer than 0.25 mm. We predicted that  
89 the rooibos tea decomposition rate data obtained from the two types of bags would not  
90 be amenable to being combined, because the finer mesh size would lead to a lower  
91 decomposition rate of rooibos tea, as the finer mesh causes slower decomposition  
92 (Bradford et al. 2002, Powers et al. 2009). On the other hand, the decomposition rate of  
93 green tea may not be affected by the difference in mesh size, given that (i) easily  
94 decomposable fractions of green tea are typically completely decomposed before the  
95 end of the 90-day incubation period (Keuskamp et al. 2013) and (ii) recalcitrant  
96 fractions are not decomposed by microbes or mesofauna during the 90-day incubation  
97 (Keuskamp et al. 2013).

98

## 99 **Materials and methods**

### 100 *Study sites*

101 The experiments were performed in a mixed forest dominated by *Chamaecyparis*  
102 *obtusa* and *Clethra barbinervis*, and in a Japanese cedar (*Cryptomeria japonica*)  
103 plantation. The mixed forest (35.07 N, 135.76 E) is located at the Kamigamo  
104 experimental station in Kyoto, Japan. The cedar plantation (32.82 N, 130.73 E) is  
105 located at the Tatsudayama research site in Kumamoto, Japan. The mean annual  
106 temperature and precipitation amounts at the research sites were 15.6 and 1,932 mm,  
107 respectively, in the mixed forest, and 17.1°C and 1,951 mm, respectively, in the cedar

108 plantation. The climate data were obtained from The Agro-Meteorological Grid Square  
109 Data of the National Agriculture and Food Research Organization (NARO).

110

### 111 *Tea bags*

112 Following the developers of the tea bag method (Keuskamp et al. 2013) and their  
113 webpage (Teatime 4 Science; <http://www.teatime4science.org/>), green tea bags (EAN:  
114 87 10908 90359 5; Lipton) and rooibos tea bags (EAN: 87 22700 18843 8; Lipton) were  
115 used. The current tea bags (polypropylene nonwoven tea bags) were used for the  
116 laboratory studies testing the impact of water content on tea bag decomposition. To  
117 examine the effect of mesh size on tea bag decomposition, we produced 0.25-mm mesh  
118 woven tea bags from the tea contained within the nonwoven tea bags and a 0.25-mm  
119 mesh (Fig. S2). Several chemical analyses were done in previous studies. According to  
120 Keuskamp et al. (2013), the fractions of nonpolar extractives, water solubles, acid  
121 solubles, and acid insolubles were  $0.066 \pm 0.003$ ,  $0.493 \pm 0.021$ ,  $0.283 \pm 0.017$ , and  
122  $0.156 \pm 0.009$ , respectively, in green tea, and  $0.049 \pm 0.013$ ,  $0.215 \pm 0.009$ ,  $0.289 \pm$   
123  $0.040$ , and  $0.444 \pm 0.040$ , respectively, in rooibos tea. Total C and N contents were  
124  $49.055 \pm 0.109\%$  and  $4.019 \pm 0.049\%$ , respectively, in green tea, and  $50.511 \pm 0.286\%$   
125 and  $1.185 \pm 0.048\%$ , respectively, in rooibos tea (Keuskamp et al. 2013). Duddigan et al.  
126 (2020) provided chemical composition data, obtained by nuclear magnetic resonance.  
127 Fractions of alkyl C, O-alkyl C, aromatic C, and carbonyl C were  $0.230 \pm 0.032$ ,  $0.570$   
128  $\pm 0.003$ ,  $0.146 \pm 0.020$ , and  $0.054 \pm 0.009$ , respectively, in green tea, and  $0.152 \pm 0.044$ ,  
129  $0.714 \pm 0.018$ ,  $0.102 \pm 0.017$ , and  $0.032 \pm 0.009$ , respectively, in rooibos tea.

130

### 131 *Laboratory studies*

132 At the Tatsudayama research site, two incubation experiments and two leaching  
133 experiments were conducted to clarify (i) the effects of water content on the tea bag  
134 decomposition rate and (ii) the potential contribution of leaching loss to the rate. First, a  
135 laboratory incubation experiment was done to test the effects of soil water content on  
136 tea bag decomposition (Water Content Experiment). Second, the potential contribution  
137 of leaching loss to the tea bag decomposition rate was estimated by calculating the ratio  
138 of the leached amount to the mass loss. The maximum and minimum leaching losses  
139 were estimated by two leaching experiments (Maximum Leaching Experiment and  
140 Minimum Leaching Experiment). The mass loss was estimated by another incubation  
141 experiment, which involved treatment with a sufficient amount of water (Total Mass  
142 Loss Experiment). In the present study, we used the relative mass loss amount of teas

143 (i.e., loss weight / initial weight) during a certain interval as an indicator of the leaching  
144 or decomposition rate, rather than the decomposition constant  $k$ .

145

#### 146 *Water Content Experiment*

147 In October 2019, soil samples (0–10 cm depth) were taken from the Tatsudayama  
148 research site in Kumamoto, Japan. We sieved the soils through a 4-mm sieve after  
149 removing large pieces of organic matter. We placed 150 g of fresh soil and two tea bags  
150 (green and rooibos teas, nonwoven tea bags) in a polyethylene terephthalate (PET)  
151 bottle (without a drainage hole). Water contents were adjusted to 27%, 39%, 48%, and  
152 56% by adding deionized water (wet weight basis). The bottles were incubated for 90  
153 days at 25°C in the dark. Four replicates were prepared for each treatment. Dry weights  
154 of the tea bags were determined immediately after the end of the incubation.

155

#### 156 *Total Mass Loss Experiment*

157 Soil samples taken from the 0–5-cm depth in September 2019 were used for the Total  
158 Mass Loss Experiment. Soils were sieved through a 2-mm sieve after large pieces of  
159 organic matter had been removed. Fresh soil (70 g) and two nonwoven tea bags (one  
160 green tea and one rooibos tea) were placed into a PET bottle with a drainage hole at the  
161 bottom (see Fig. S3). The bottles were incubated for 90 days at 3°C (in a cold room) or  
162 25°C (in an incubator). Four replicates were prepared for each treatment. To prevent  
163 water evaporation, all bottles were covered with a polyethylene sheet (Mori et al. 2013).  
164 At 10, 23, 57, and 90 days after the start of the incubation, 100, 100, 200, and 200 mL  
165 of deionized water was added to simulate precipitation, respectively. In several samples,  
166 the added deionized water (200 mL) on the last day (day 90) did not drain for several  
167 hours, so the incubation ended without complete drainage of the added water. Tea bags  
168 were oven-dried immediately after the end of the incubation period to prevent further  
169 decomposition. After removing the polypropylene fabric and soils on the surface of the  
170 fabric, teas were placed in an oven again (70°C for 72 h) and dry weights were  
171 determined.

172

#### 173 *Minimum Leaching Experiment*

174 A leaching experiment was conducted to determine the minimum leaching losses, using  
175 the same soils as in the Total Mass Loss Experiment described above. To exclude any  
176 impact of microorganisms on mass loss of the tea bags, soils were autoclaved at 120°C  
177 for 1 h. The autoclaved soils (70 g) and two nonwoven tea bags (green and rooibos teas)  
178 were placed into the PET bottle with a drainage hole (Fig. S3). Distilled water (600 mL)

179 was added at 3°C (in a cold room) or 25°C (in an incubator). Three replicates were  
180 prepared for each treatment. After the water had been drained, tea bags were oven-dried  
181 immediately, and their dry weights were determined as described above.

182

### 183 *Maximum Leaching Experiment*

184 The maximum leaching loss of the tea bags was measured based on a modified version  
185 of the method of Nykvist (1959). Tea bags (nonwoven tea bags) were submerged in 300  
186 mL of deionized water in glass or plastic bottles, and leaching loss at different  
187 temperatures and submerging durations was determined. Leaching proceeded in a cold  
188 room (3°C) or incubators (15°C and 25°C) for 10 min, 140 min, or 24 h. Three  
189 replicates were prepared for each treatment. Dry weights were determined immediately  
190 after the end of the experiment.

191

### 192 *Field experiments*

193 Tea bag decomposition rates were compared between 0.25-mm mesh tea bags and  
194 nonwoven tea bags in the mixed forest at Kamigamo research station and the Japanese  
195 cedar plantation at the Tatsudayama research site. At each study site, we used four sub  
196 plots. Pairs of 0.25-mm mesh tea bags and nonwoven tea bags (both green and rooibos  
197 tea bags) were buried with two replicates at 8-cm depth, following Keuskamp et al.  
198 (2013). The bags were re-collected after 90 days. Dry weights (oven-dried at 70°C for  
199 72 h) were measured after removal of the mesh and soils on the surface thereof. The  
200 90-day field incubation was initiated in October 2019 and September 2019 in the mixed  
201 forest and Japanese cedar plantation, respectively. The average temperature and  
202 cumulative precipitation during the 90-day field incubation experiments was 10.9°C and  
203 116 mm, respectively, in the mixed forest, and 15.5°C and 359 mm, respectively, in the  
204 cedar plantation (Fig. S4, obtained from The Agro-Meteorological Grid Square Data,  
205 NARO).

206

### 207 *Calculation and statistics*

208 The lower bounds of the potential contribution (minimum contribution) of leaching loss  
209 to the tea bag decomposition rate was estimated by calculating the ratio of the minimum  
210 leaching loss (determined in the Minimum Leaching Experiment) to the total mass loss  
211 (determined in the Total Mass Loss Experiment). The upper bound of the potential  
212 contribution (maximum contribution) of leaching loss to the tea bag decomposition rate  
213 was estimated by calculating the ratio of the leaching loss during 24-h submergence in  
214 water (determined in the Maximum Leaching Experiment) to the total mass loss

215 (determined in the Total Mass Loss Experiment), assuming that the leachable fraction of  
216 the teas was mainly lost during the 24-h submergence period.

217 Statistical differences among treatments were tested using analysis of variance  
218 (ANOVA; one-, two-, or three-way) and the paired *t*-test, assuming a normal  
219 distribution of the data. Tukey's HSD was used as a post hoc test as necessary. All  
220 statistical analyses were performed using R software (version 3.5.3 and 4.0.2; R  
221 Development Core Team 2019, 2020).

222

## 223 **Results**

### 224 *Effects of water content on tea bag decomposition*

225 The Water Content Experiment revealed the relationship between soil water content and  
226 tea bag decomposition rate. Two-way ANOVA showed that the interactive effect of  
227 moisture and tea type was significant (Fig. 1). According to the post hoc analysis, (i) up  
228 to a gravimetric soil water content of 48% (wet weight basis), the tea bag decomposition  
229 rate increased with increasing soil water content, but (ii) decomposition was suppressed  
230 at the highest water content in both green tea and rooibos tea (Fig. 1).

231

### 232 *Leaching loss of teas*

233 Both tea type and temperature influenced the minimum leaching loss, with greater  
234 leaching for green tea and higher temperatures (Fig. 2a). Leaching loss when tea bags  
235 were submerged in 300 mL of water increased until 140 min, but was not further  
236 elevated at 24 h (Fig. 3) with the exception of green tea at 15°C (increasing until 24 h;  
237 Tukey's post hoc test, Fig. 3). The results indicated that the leaching loss at 24 h was the  
238 maximum leaching loss. Tukey's HSD indicated that (i) green tea experienced more  
239 leaching loss than rooibos tea and (ii) differences in temperature only affected the  
240 leaching loss from green tea at 10 min, where higher temperature caused a larger  
241 amount of leaching loss (Fig. 3).

242

### 243 *Contribution of leaching loss to tea bag decomposition*

244 The lower bounds of the contribution of leaching loss to the tea bag decomposition rates  
245 ranged from 0.23 to 0.45, while the upper bounds reached as high as 0.89 (rooibos tea at  
246 3°C) (Fig. 4). For green tea, the contribution of leaching loss to tea bag decomposition  
247 was largest at 25°C (Fig. 4).

248

### 249 *Effects of mesh size on tea bag decomposition*

250 The decomposition rate of green tea was not significantly affected by mesh size in either



251 forest (Fig. 5), while the mass loss of rooibos tea ( $0.281 \pm 0.01$ ) in nonwoven bags was  
252 slightly but significantly higher than that of 0.25 mm-mesh bags ( $0.242 \pm 0.01$ ) at the  
253 Japanese cedar plantation (Fig. 5b).

254

## 255 **Discussion**

### 256 *Effects of water content on tea bag decomposition*

257 Both green tea and rooibos tea exhibited higher decomposition rates with higher water  
258 contents, but the highest water content inhibited decomposition (Fig. 1); this was  
259 consistent with the conceptual models of Prescott (2010). This result was most likely  
260 due to the reductive condition suppressing decomposition (Neckles & Neill 1994). The  
261 fact that the responses of both teas to the wetter condition were consistent with a  
262 conceptual model justifies the usage of tea bags to natural litters in studies of organic  
263 matter decomposition in wet conditions. Furthermore, the present results could help  
264 improve models of tea bag decomposition rates (ex. Didion et al. 2016). The “concave  
265 down shape” relationship between water content and tea bag decomposition rate could  
266 be adopted in such models.

267

### 268 *Potential contribution of leaching to tea bag decomposition rate*

269 The leaching losses of rooibos tea after 24 h at 3°C, 15°C, and 25°C ( $0.15 \pm 0.005$ ,  $0.16$   
270  $\pm 0.001$ , and  $0.15 \pm 0.003$ , respectively, Fig. 2) were comparable with those of other  
271 litters reported in previous studies (Nykvist 1959, Taylor & Parkinson 1988, Ibrahima et  
272 al. 2008). Ibrahima et al. (2008) reported the mass losses of leaf litters of the following  
273 eight agroforestry species after submergence in water: *Lophira lanceolata*, *Vitex*  
274 *doniana*, *Vitellaria paradoxa*, *Syzygium guineense* var. *guineense*, *Annona senegalensis*,  
275 *Syzygium guineense* var. *macrocarpum*, *Vitex madiensis*, and *Ximenia americana*. They  
276 demonstrated that all of the litters showed leaching losses below 20% during the 24-h  
277 submersion (all less than 10% except for *V. madiensis* and *X. americana*).

278 By contrast, green teas exhibited extremely large leaching losses (Fig. 1a). The  
279 leaching losses of green teas after 24 h at 3°C, 15°C, and 25°C ( $0.38 \pm 0.01$ ,  $0.41 \pm 0.01$ ,  
280 and  $0.42 \pm 0.01$ , respectively) were much larger than in previous reports (Nykvist 1959,  
281 Taylor & Parkinson 1988, Ibrahima et al. 2008). The much larger fractions of nonpolar  
282 extractives and water solubles (hot water-extracted) in green tea compared to rooibos  
283 tea (Keuskamp et al. 2013) likely caused the larger leaching loss of green tea. The  
284 contrasting leaching losses of the two types of teas caused the larger potential  
285 contribution of leaching loss to the decomposition rate of green tea compared to that of  
286 rooibos tea, especially at the higher temperature of 25°C (Fig 3).



287

288 *Effects of mesh size on tea bag decomposition*

289 Contrary to our hypothesis, the finer mesh size did not suppress the decomposition of  
290 rooibos tea. In the mixed forest, no significant difference in decomposition rate was  
291 observed between nonwoven and 0.25 mm-mesh tea bags, while in the cedar plantation  
292 the decomposition rate of rooibos tea was somewhat quicker for the finer nonwoven tea  
293 bags (although the mesh size effect was small; Fig. 5b). These results contrasted with  
294 earlier works, wherein finer mesh size caused slower decomposition (Bradford et al.  
295 2002, Powers et al. 2009). It seems unlikely that the soil contamination caused the  
296 slower decomposition of the bags with coarser mesh, because the contamination was  
297 negligible in our study sites (personal observation). We cannot fully explain the  
298 phenomenon, which differed from the literature. One possible mechanism is as follows:  
299 a greater abundance of microorganisms decomposed litters due to the decrease in  
300 predation by mesofauna in the finer nonwoven bags. This hypothesis requires further  
301 study and quantification of mesofauna. On the other hand, green tea decomposition was  
302 not affected by the difference in mesh size, consistent with our initial hypothesis.  
303 Keuskamp et al. (2013) suggested that the decomposable fraction of green tea is  
304 completely decomposed before the end of the 90-day incubation period. In such a case,  
305 changes in mesh size and mesofauna abundance would not stimulate green tea  
306 decomposition.

307 Overall, the present study demonstrated that tea bag decomposition during a  
308 90-day incubation period was not markedly affected by mesh size. Although the  
309 decomposition of rooibos tea was slightly stimulated by a change in the mesh size at the  
310 cedar plantation (from  $0.242 \pm 0.01$  [nonwoven bags] to  $0.281 \pm 0.01$  [0.25 mm-mesh  
311 bags], Fig. 5b), the impact was not large. Our unexpected results may justify combining  
312 the decomposition data of the two types of tea bags, namely, the previously produced  
313 woven nylon mesh tea bags and the currently used polypropylene tea bags. However,  
314 the number of observations in the present experiment was not sufficient to draw a  
315 definitive conclusion; additional studies with more observations are therefore necessary.

316

317 **Conclusion**

318 The present study provides essential information for future studies on tea bag  
319 decomposition. First, we confirmed that both green and rooibos teas exhibited higher  
320 decomposition rates with higher water contents, although decomposition was inhibited  
321 at the highest water content; this was consistent with conceptual models of natural litters  
322 and justifies the assumption that tea bags are representative of natural litters. Second,

323 we unexpectedly found that the impact of tea bag mesh size on decomposition might be  
324 insignificant. Thus, it may be possible to combine the decomposition data of the two  
325 types of tea bags, namely, the currently used bags and the previous ones, which are  
326 currently unavailable. Further studies with more study sites are required to test this.

327

### 328 **Acknowledgement**

329 We thank all staff members of the Kamigamo experimental station, Field Science  
330 Education and Research Center, Kyoto University. We thank Dr. Yoshihiro Takahata for  
331 his professional advices on the laboratory work. We thank Ms Yumiko Sakamoto and  
332 Ms Akane Sakumori for their assistance on the laboratory work. This study was  
333 financially supported by JSPS KAKENHI Grant Number JP19K15879.

334

### 335 **Conflict of interest**

336 We declare that we do not have any conflict of interest.

337

338

339 **References**

- 340 Bradford MA, Tordoff GM, Eggers T, Jones TH, Newington JE (2002). Microbiota,  
341 fauna, and mesh size interactions in litter decomposition. *Oikos*. 99: 317–323. -  
342 doi: 10.1034/j.1600-0706.2002.990212.x
- 343 Cornwell WK, Cornelissen JHC, Amatangelo K, Dorrepaal E, Eviner VT, Godoy O,  
344 Hobbie SE, Hoorens B, Kurokawa H, Pérez-Harguindeguy N, Queded HM,  
345 Santiago LS, Wardle D a., Wright IJ, Aerts R, Allison SD, Van Bodegom P,  
346 Brovkin V, Chatain A, Callaghan T V., Díaz S, Garnier E, Gurvich DE, Kazakou E,  
347 Klein J a., Read J, Reich PB, Soudzilovskaia N a., Vaieretti MV, Westoby M  
348 (2008). Plant species traits are the predominant control on litter decomposition  
349 rates within biomes worldwide. *Ecology Letters*. 11: 1065–1071. - doi:  
350 10.1111/j.1461-0248.2008.01219.x
- 351 Didion M, Repo A, Liski J, Forsius M, Bierbaumer M, Djukic I (2016). Towards  
352 harmonizing leaf litter decomposition studies using standard tea bags-a field study  
353 and model application. *Forests*. 7: 1–12. - doi: 10.3390/f7080167
- 354 Djukic I, Kepfer-rojas S, Kappel I, Steenberg K, Caliman A, Paquette A,  
355 Gutiérrez-girón A, Humber A, Valdecantos A, Petraglia A, Alexander H,  
356 Augustaitis A, Saillard A, Carolina A, Fernández R, Sousa AI, Lillebø AI, Gripp R,  
357 Quinde JD, Alatalo J, Seeber J, Stadler J, Kriiska K, Coulibaly K, Brigham LM,  
358 Brink L Van Den, Rustad L, Zhang L, Morillas L, Morley M, Lebouvier M,  
359 Tomaselli M, Sternberg M, Schaub M (2018). Early stage litter decomposition  
360 across biomes. 629: 1369–1394. - doi: 10.1016/j.scitotenv.2018.01.012
- 361 Duddigan S, Shaw LJ, Alexander PD, Collins CD, Society RH (2020). Chemical  
362 Underpinning of the Tea Bag Index: An Examination of the Decomposition of  
363 Tea Leaves. 2020.
- 364 Fujii S, Mori AS, Koide D, Makoto K, Matsuoka S, Osono T, Isbell F (2017).  
365 Disentangling relationships between plant diversity and decomposition processes  
366 under forest restoration. *Journal of Applied Ecology*. 54: 80–90. - doi:  
367 10.1111/1365-2664.12733
- 368 Ibrahima A, Biyanzi P, Halima M (2008). Changes in organic compounds during leaf  
369 litter leaching: Laboratory experiment on eight plant species of the Sudano-guinea  
370 Savannas of Ngaoundere, Cameroon. *IForest*. 1: 27–33. - doi:  
371 10.3832/ifor0450-0010027
- 372 Keuskamp JA, Dingemans BJJ, Lehtinen T, Sarneel JM, Hefting MM (2013). Tea Bag  
373 Index: A novel approach to collect uniform decomposition data across ecosystems.  
374 *Methods in Ecology and Evolution*. 4: 1070–1075. - doi:

- 375 10.1111/2041-210X.12097
- 376 Mori T, Ohta S, Ishizuka S, Konda R, Wicaksono A, Heriyanto J, Hardjono A (2013).  
377 Effects of phosphorus addition with and without ammonium, nitrate, or glucose on  
378 N<sub>2</sub>O and NO emissions from soil sampled under *Acacia mangium* plantation and  
379 incubated at 100 % of the water-filled pore space. *Biology and Fertility of Soils*. 49.  
380 - doi: 10.1007/s00374-012-0690-5
- 381 Mueller P, Schile-Beers LM, Mozdzer TJ, Chmura GL, Dinter T, Kuzyakov Y, De  
382 Groot A V., Esselink P, Smit C, D'Alpaos A, Ibáñez C, Lazarus M, Neumeier U,  
383 Johnson BJ, Baldwin AH, Yarwood SA, Montemayor DI, Yang Z, Wu J, Jensen K,  
384 Nolte S (2018). Global-change effects on early-stage decomposition processes in  
385 tidal wetlands-implications from a global survey using standardized litter.  
386 *Biogeosciences*. 15: 3189–3202. - doi: 10.5194/bg-15-3189-2018
- 387 Neckles HA, Neill C (1994). Hydrologic control of litter decomposition in seasonally  
388 flooded prairie marshes. *Hydrobiologia*. 286: 155–165. - doi:  
389 10.1007/BF00006247
- 390 Nykvist N (1959). Leaching and Decomposition of Litter I . Experiments on Leaf Litter  
391 of *Fraxinus excelsior*. *Oikos*. 10: 190–211.
- 392 Petraglia A, Cacciatori C, Chelli S, Fenu G, Calderisi G, Gargano D, Abeli T, Orsenigo  
393 S, Carbognani M (2019). Litter decomposition: effects of temperature driven by  
394 soil moisture and vegetation type. *Plant and Soil*. 435: 187–200. - doi:  
395 10.1007/s11104-018-3889-x
- 396 Powers JS, Montgomery RA, Adair EC, Brearley FQ, Dewalt SJ, Castanho CT, Chave J,  
397 Deinert E, Ganzhorn JU, Gilbert ME, González-Iturbe JA, Bunyavejchewin S,  
398 Grau HR, Harms KE, Hiremath A, Iriarte-Vivar S, Manzano E, De Oliveira AA,  
399 Poorter L, Ramanamanjato JB, Salk C, Varela A, Weiblen GD, Lerdau MT (2009).  
400 Decomposition in tropical forests: A pan-tropical study of the effects of litter type,  
401 litter placement and mesofaunal exclusion across a precipitation gradient. *Journal*  
402 *of Ecology*. 97: 801–811. - doi: 10.1111/j.1365-2745.2009.01515.x
- 403 Prescott CE (2010). Litter decomposition: What controls it and how can we alter it to  
404 sequester more carbon in forest soils? *Biogeochemistry*. 101: 133–149. - doi:  
405 10.1007/s10533-010-9439-0
- 406 R Core Team (2019). R: A language and environment for statistical computing.  
407 Statistical, R Foundation for Computing, Vienna, Austria. URL  
408 <https://www.R-project.org/>.
- 409 R Core Team (2020). R: A language and environment for statistical computing.  
410 Statistical, R Foundation for Computing, Vienna, Austria. URL

- 411 <https://www.R-project.org/>.
- 412 Suzuki SN, Ataka M, Djukic I, Enoki T, Fukuzawa K, Hirota M, Hishi T, Hiura T,  
413 Hoshizaki K, Ida H, Iguchi A, Iimura Y, Ise T, Kenta T, Kina Y, Kobayashi H,  
414 Kominami Y, Kurokawa H, Makoto K, Matsushita M, Miyata R, Muraoka H,  
415 Nakaji T, Nakamura M, Niwa S, Noh NJ, Sato T, Seino T, Shibata H, Suzuki RO,  
416 Takahashi K, Tsunoda T, Ustumi T, Watanabe K (2019). Harmonized data on  
417 early stage litter decomposition using tea material across Japan. *Ecological*  
418 *Research*. 34: 575–576. - doi: 10.1111/1440-1703.12032
- 419 Taylor BR, Parkinson D (1988). Patterns of water absorption and leaching in pine and  
420 aspen leaf litter. *Soil Biology and Biochemistry*. 20: 257–258. - doi:  
421 10.1016/0038-0717(88)90047-8
- 422 Zhang D, Hui D, Luo Y, Zhou G (2008). Rates of litter decomposition in terrestrial  
423 ecosystems: global patterns and controlling factors. *Journal of Plant Ecology*. 1:  
424 85–93. - doi: 10.1093/jpe/rtn002
- 425

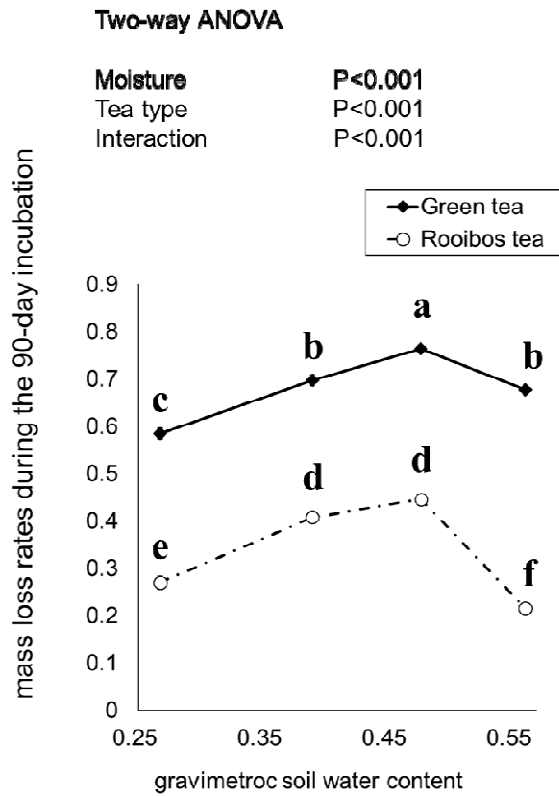

426

427 **Fig. 1. Effects of water content on tea bag decomposition (Water Content Experiment). Tea bags were**  
428 **incubated with soils taken from a Japanese cedar plantation at four different water contents (27%, 39%, 48%,**  
429 **and 56%, wet weight basis). The error bars indicate the standard error of the four replicates.**

430

431



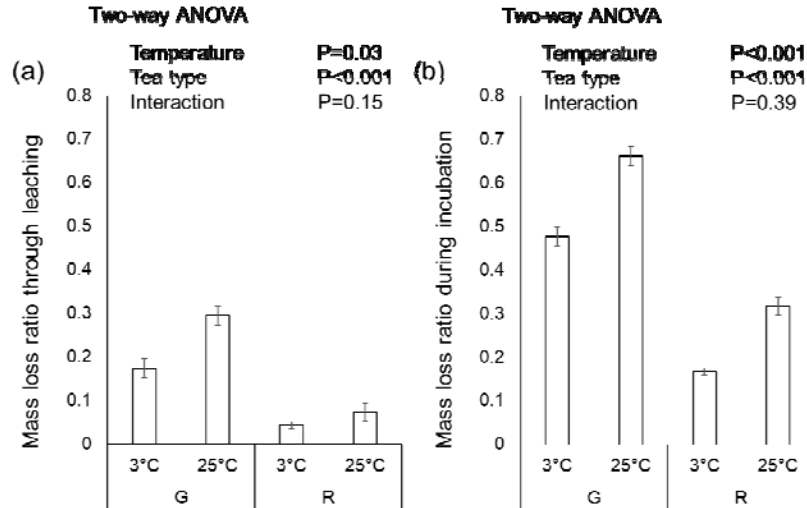

432

433

434

435

436

437

438

439

440

441

**Fig. 2. Mass loss of green and rooibos teas relative to the initial weights (a) through leaching (Minimum Leaching Experiment) and (b) during a 90-day laboratory incubation period (Laboratory Decomposition Experiment). New tea bags made from polypropylene fabric (see main text) and soil taken from a Japanese cedar plantation were placed in PET bottles with drainage holes (see Fig. S3), and leaching and incubation experiments were conducted at 3°C and 25°C. The soil used for the leaching experiments was autoclaved at 120°C for 1 h to prevent any impact of microorganisms on mass loss of the tea bags. G, green tea. R, rooibos tea. The error bars indicate the standard error of the four replicates.**

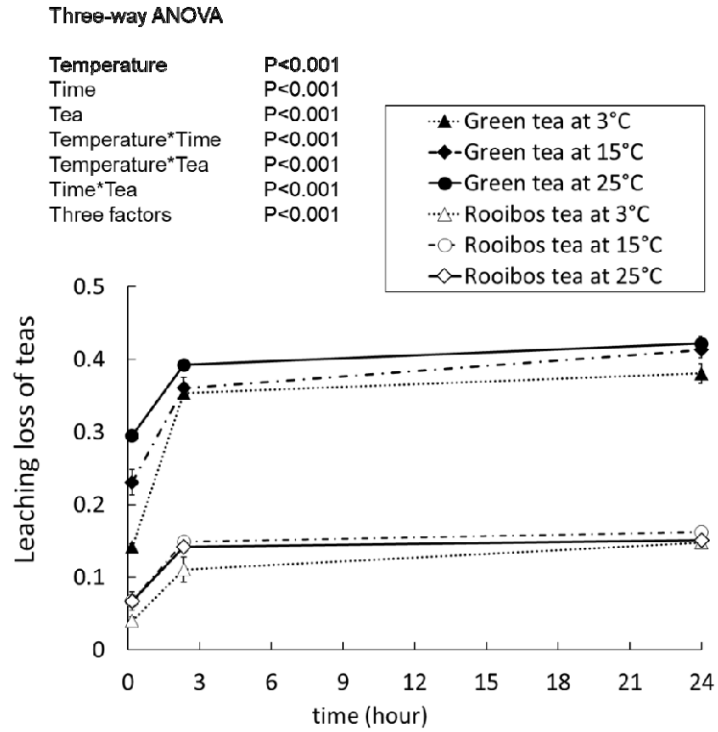

442

443

444

445

446

447

448

449

**Fig. 3. Mass loss of green and rooibos teas relative to the initial weights during the Maximum Leaching Experiment. Effects of temperature and submergence duration on the ratio of leaching loss to the initial amount of green tea and rooibos tea (Maximum Leaching Experiment) were determined. New tea bags made from polypropylene fabric (see main text) were submerged in 300 mL water for 10 min, 140 min, and 24 h at 3°C, 15°C, and 25°C. The error bars indicate the standard error of the three replicates.**

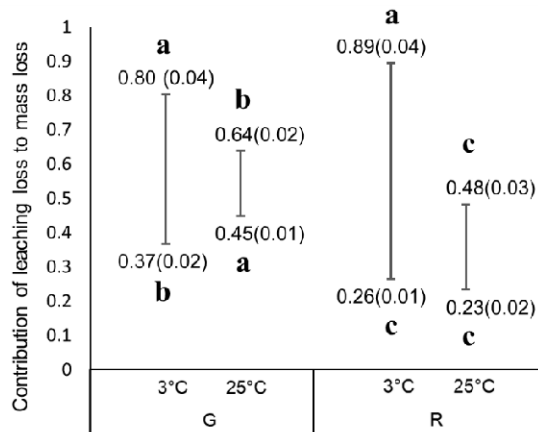

450

451 **Fig. 4. Potential contribution of leaching loss to the mass loss of green and rooibos teas. Upper bounds were**  
452 **calculated as the ratio of the maximum leaching loss (Maximum Leaching Experiment) to the mass loss during**  
453 **the laboratory decomposition experiment (Total Mass Loss Experiment). Lower bounds were calculated as the**  
454 **ratio of the minimum leaching loss (Maximum Leaching Experiment) to the mass loss during the laboratory**  
455 **decomposition experiment (Total Mass Loss Experiment). Different letters on the graph indicate significant**  
456 **differences among the data for the upper bounds and lower bounds, determined using Tukey's HSD followed**  
457 **by one-way ANOVA ( $P < 0.05$ ). G, green tea. R, rooibos tea. The values on the graph are averaged data (with**  
458 **standard error) of the four replicates in parentheses.**

459

460

461

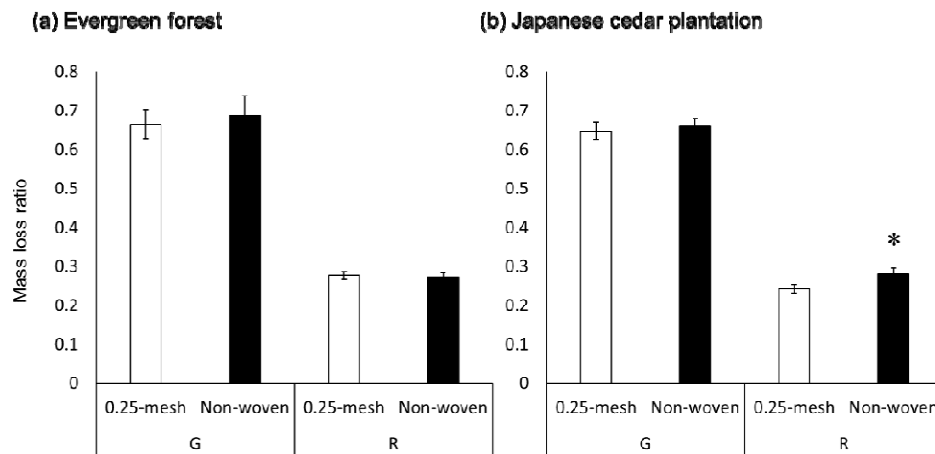

462

463 **Fig. 5. Effects of mesh size on mass loss relative to the initial weight in (a) a mixed forest and (b) a Japanese**  
464 **cedar plantation. G, green tea. R, rooibos tea. 0.25-mesh, 0.25-mm mesh woven tea bags filled with tea from**  
465 **nonwoven teabags (Fig. S2). Nonwoven, polypropylene nonwoven tea bags with a non-uniform mesh size finer**  
466 **than 0.25 mm (see Fig. S1). \*P < 0.05, old vs. new tea bags, paired *t*-test. Error bars indicate the standard error**  
467 **of the four replicates. Field incubation was performed for 90 days.**

468

469

470 **Supporting information**

(a) Relatively coarse area

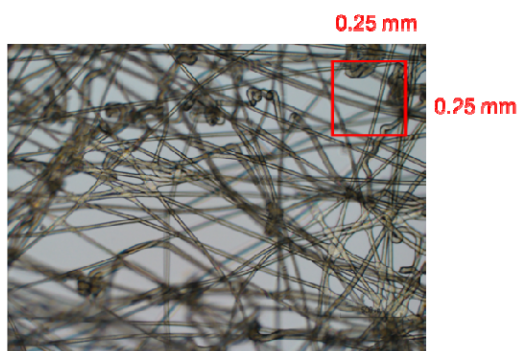

(b) Relatively dense area

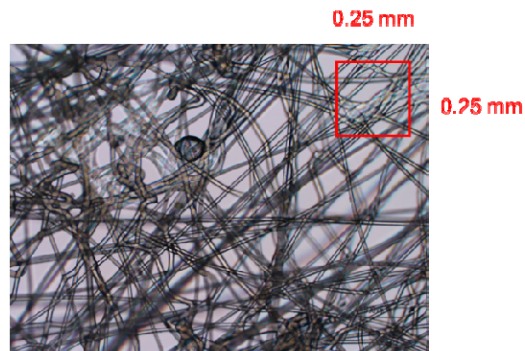

471

472 **Fig. S1. Polypropylene nonwoven new bags with non-uniform mesh sizes. A relatively coarse area (a) and**

473 **relatively dense area (b) are shown.**

474

475

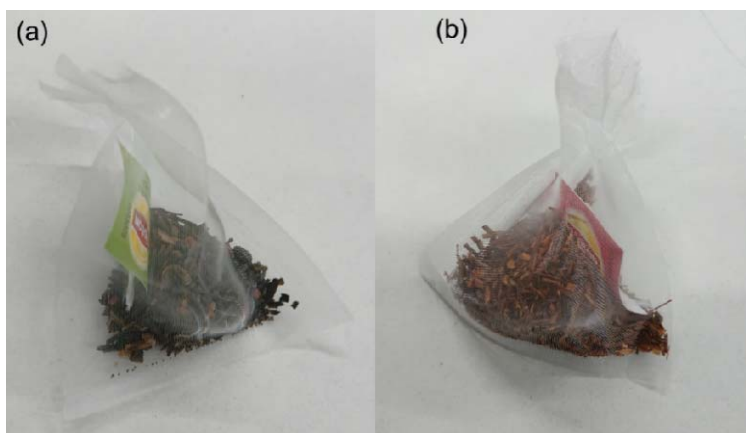

476

477

**Fig. S2. Tea bags for (a) green tea and (b) rooibos tea made from 0.25-mm mesh and tea contained within the**

478

**nonwoven tea bags.**

479

480



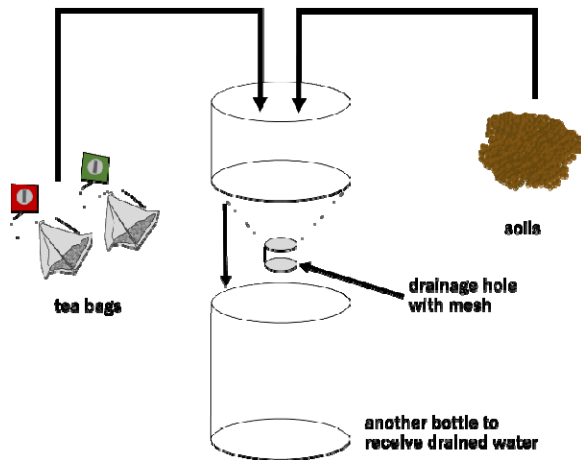

481

482 **Fig. S3. Bottles used in the Total Mass Loss Experiment and Minimum Leaching Experiment.**

483

484

485 **Fig. S4. Climate data obtained during the field incubation period. Daily temperatures of the (a) evergreen**  
486 **forest and (b) Japanese cedar plantation, and daily precipitation amounts for the (c) evergreen forest and (d)**  
487 **Japanese cedar plantation, were determined by The Agro-Meteorological Grid Square Data, NARO.**

488

489
